# Supplementary figures and images for: Long-range population dynamics of anatomically defined neocortical networks
Source: eLife journal article supplement (doi:10.7554/elife.14679), 2016-05-24

**Figure 6 - figure supplement 3.**

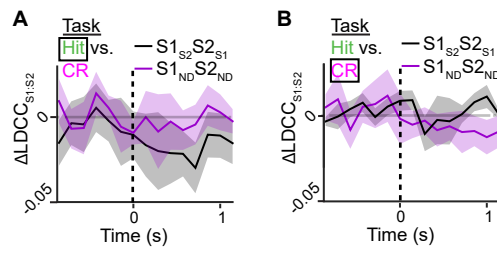

Supplement: supp [file elife-14679-supp-v1.zip]

Figure 1 - figure supplement 1.

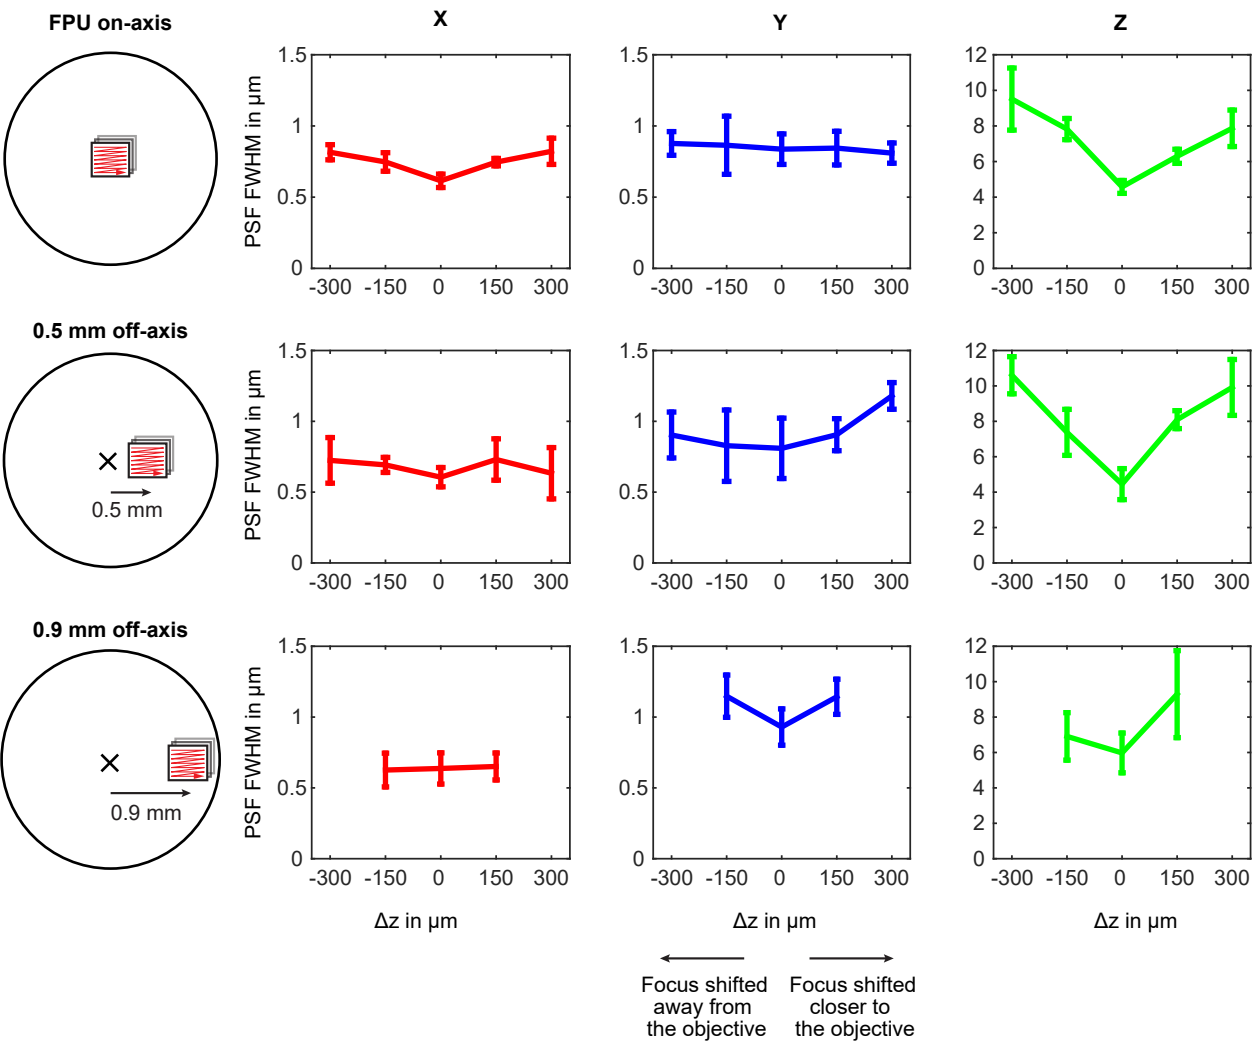

Supplement: supp [file elife-14679-supp-v1.zip]

Figure 5 - figure supplement 2.

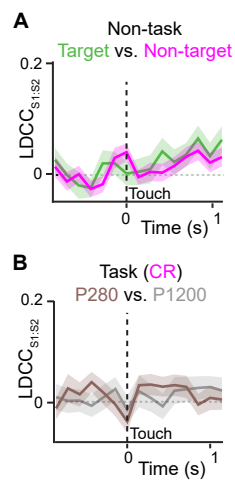

Supplement: supp [file elife-14679-supp-v1.zip]

**Figure 1 - figure supplement 2.**

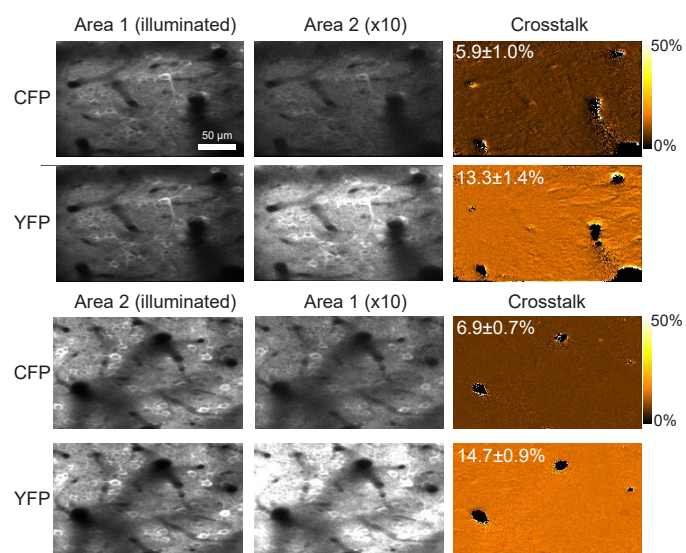

Supplement: supp [file elife-14679-supp-v1.zip]

Figure 5 - figure supplement 1.

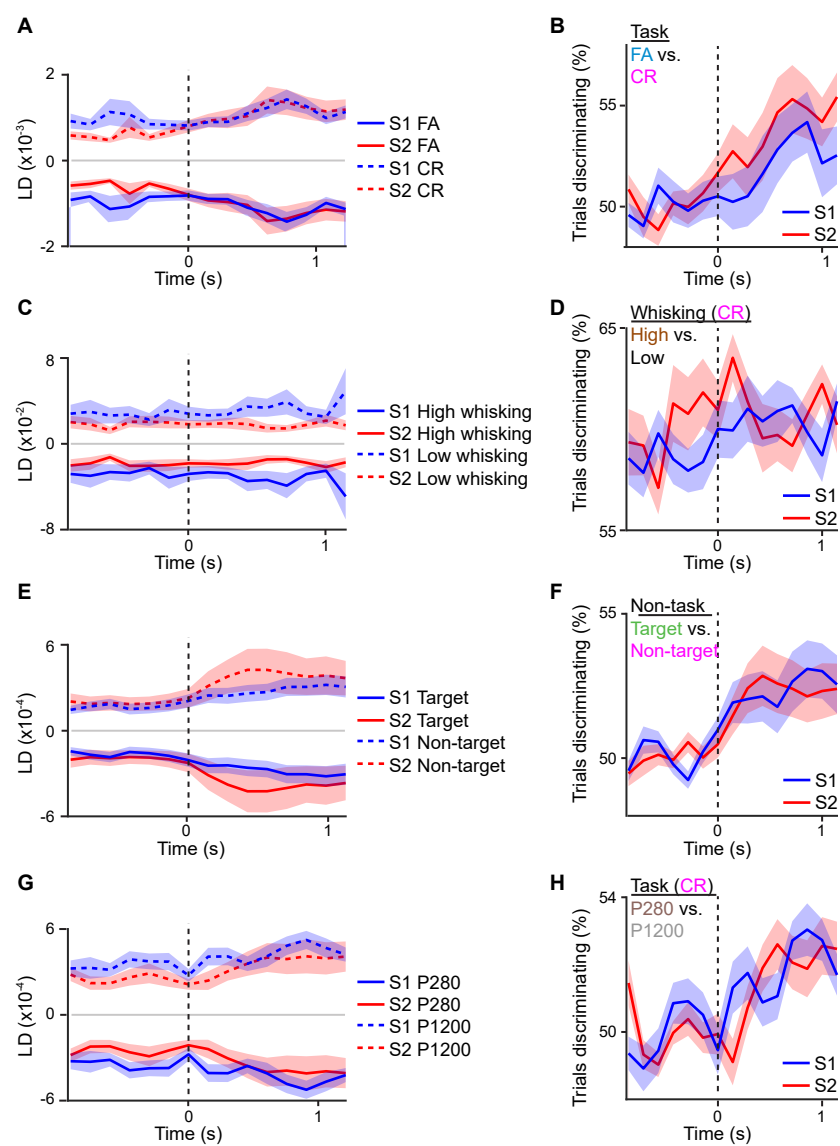

Supplement: supp [file elife-14679-supp-v1.zip]

Figure 3 - figure supplement 1.

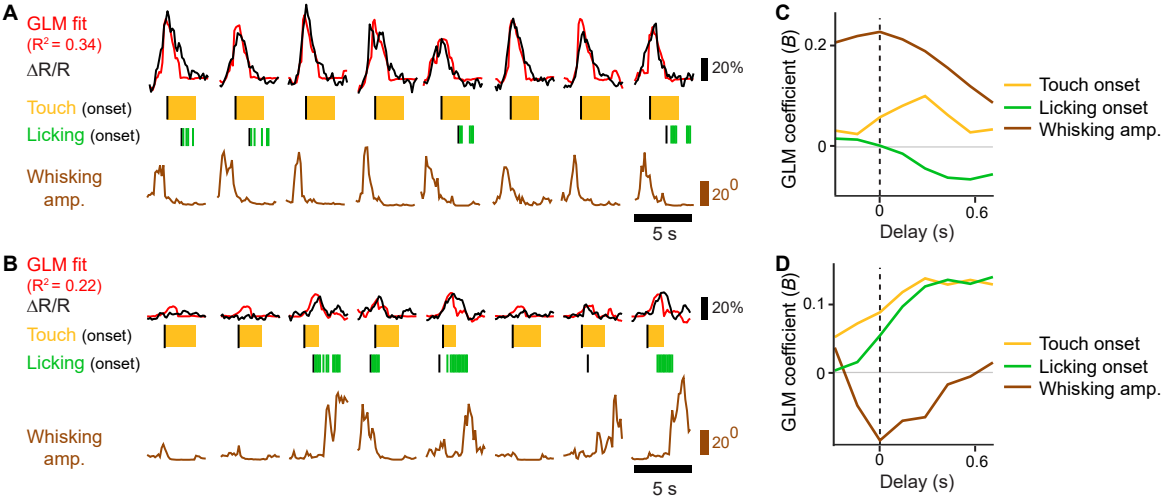

Supplement: supp [file elife-14679-supp-v1.zip]

Figure 6 - figure supplement 2.

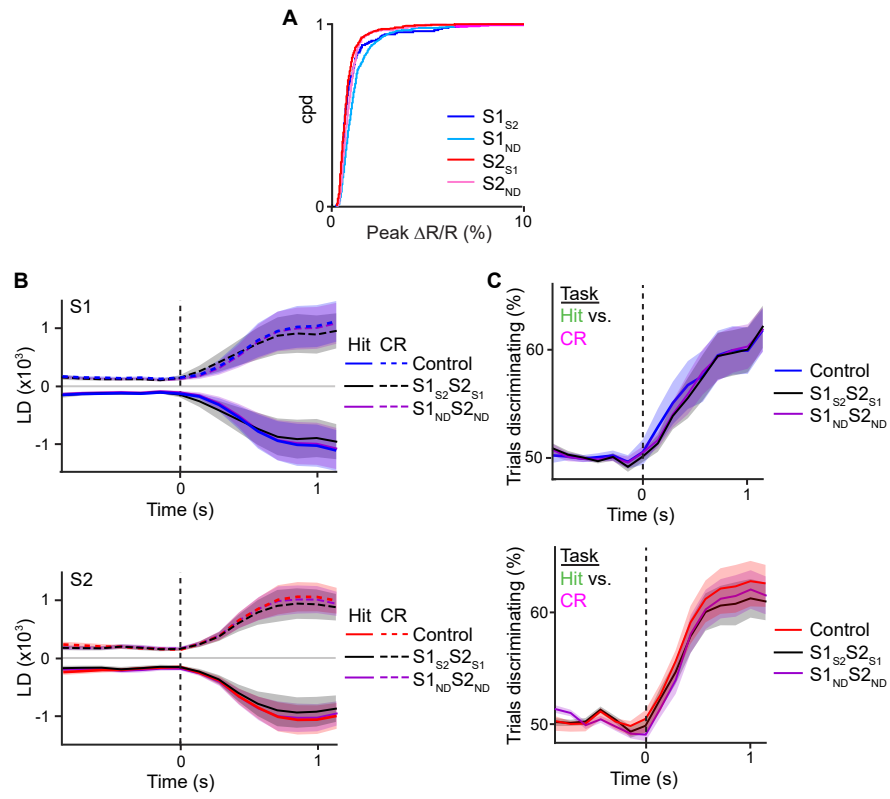

Supplement: supp [file elife-14679-supp-v1.zip]

**Figure 2 - figure supplement 1.**

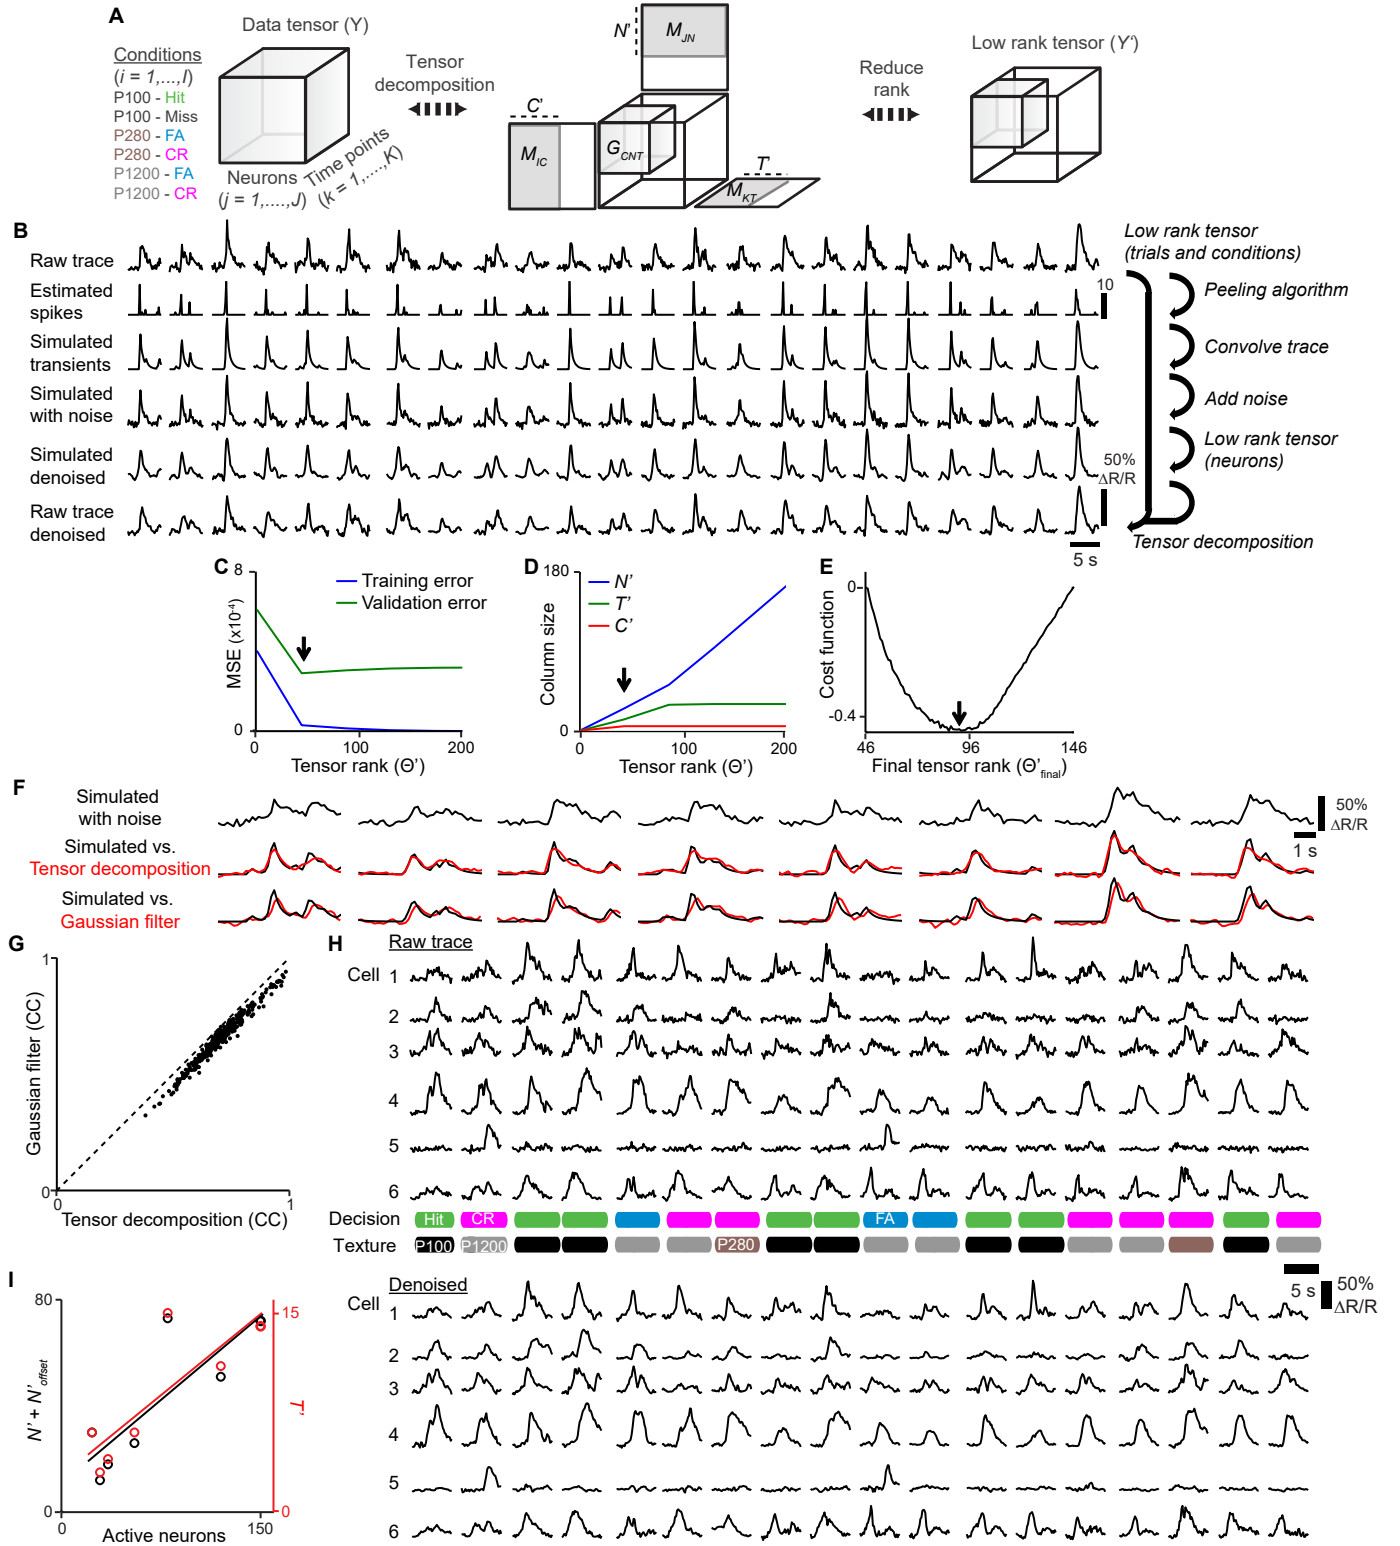

Supplement: supp [file elife-14679-supp-v1.zip]

**Figure 6 - figure supplement 1.**

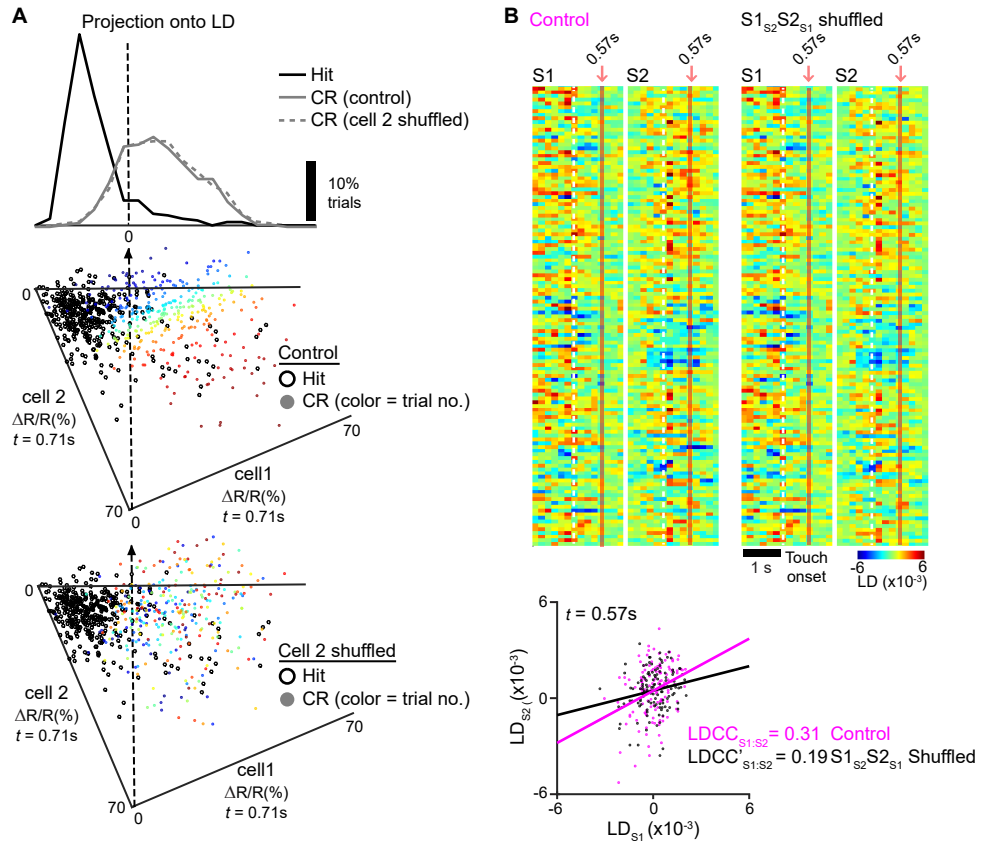

Supplement: supp [file elife-14679-supp-v1.zip]
